# Supplementary material
Source: publisher site journal article supplement (https://www.dovepress.com/article/167422)
Supplement: Supplementary file 1 [file get_supplementary_file.php]

## The full search strategy of pubmed:

((((((((((((((Adrenergic[All Fields] AND beta-Antagonist[All Fields]) OR ("adrenergic beta-antagonists"[Pharmacological Action] OR "adrenergic beta-antagonists"[MeSH Terms] OR ("adrenergic"[All Fields] AND "beta-antagonists"[All Fields]) OR "adrenergic beta-antagonists"[All Fields] OR ("beta"[All Fields] AND "blocker"[All Fields]) OR "beta blocker"[All Fields])))) OR ("atenolol"[MeSH Terms] OR "atenolol"[All Fields])) OR ("arotinolol"[Supplementary Concept] OR "arotinolol"[All Fields])) OR ("betaxolol"[MeSH Terms] OR "betaxolol"[All Fields])) OR ("bevantolol"[Supplementary Concept] OR "bevantolol"[All Fields])) OR ("carteolol"[MeSH Terms] OR "carteolol"[All Fields])) OR ("celiprolol"[MeSH Terms] OR "celiprolol"[All Fields])) OR ("timolol"[MeSH Terms] OR "timolol"[All Fields])) OR ("sotalol"[MeSH Terms] OR "sotalol"[All Fields])) OR ("propranolol"[MeSH Terms] OR "propranolol"[All Fields])) OR ("metoprolol"[MeSH Terms] OR "metoprolol"[All Fields])) OR ("carvedilol"[Supplementary Concept] OR "carvedilol"[All Fields])) OR ("bisoprolol"[MeSH Terms] OR "bisoprolol"[All Fields])) AND (((("tumour"[All Fields] OR "neoplasms"[MeSH Terms] OR "neoplasms"[All Fields] OR "tumor"[All Fields]) OR ("neoplasms"[MeSH Terms] OR "neoplasms"[All Fields] OR "neoplasm"[All Fields])) OR ("neoplasms"[MeSH Terms] OR "neoplasms"[All Fields] OR "malignancy"[All Fields])) OR ("carcinoma"[MeSH Terms] OR "carcinoma"[All Fields])) OR ("neoplasms"[MeSH Terms] OR "neoplasms"[All Fields] OR "cancer"[All Fields])) AND (((("prognosis"[MeSH Terms] OR "prognosis"[All Fields]) OR ("mortality"[Subheading] OR "mortality"[All Fields] OR "survival"[All Fields] OR "survival"[MeSH Terms])) OR ("mortality"[Subheading] OR "mortality"[All Fields] OR "mortality"[MeSH Terms]))))
